# Supplementary material
Source: Springer Nature journal article supplement (https://www.springermedizin.de/resource/supplementary/12891_2014_2440_MOESM2_ESM.pdf/9509572)
Supplement: MOESM2 [file 9509572]

| Before the study begins                                                                                                                                                                                                                                                    | At screening                                                                                                                                                                                                                                                                                                                                                                                  | At baseline                                                                                                                                                                                                                                                                                                                | During the study                                                                                                                                                                                                                                                                                                                                                                                                                                                        | For patients who are difficult to contact                                                                                                                                                                                                                                                                                                                                                                                                                                |
|----------------------------------------------------------------------------------------------------------------------------------------------------------------------------------------------------------------------------------------------------------------------------|-----------------------------------------------------------------------------------------------------------------------------------------------------------------------------------------------------------------------------------------------------------------------------------------------------------------------------------------------------------------------------------------------|----------------------------------------------------------------------------------------------------------------------------------------------------------------------------------------------------------------------------------------------------------------------------------------------------------------------------|-------------------------------------------------------------------------------------------------------------------------------------------------------------------------------------------------------------------------------------------------------------------------------------------------------------------------------------------------------------------------------------------------------------------------------------------------------------------------|--------------------------------------------------------------------------------------------------------------------------------------------------------------------------------------------------------------------------------------------------------------------------------------------------------------------------------------------------------------------------------------------------------------------------------------------------------------------------|
| <ul style="list-style-type: none"> <li>• Create a study identity that includes a logo on all study documents</li> <li>• Train research personnel in maintaining participant confidentiality</li> <li>• Ensure all study personnel are aware of study procedures</li> </ul> | <ul style="list-style-type: none"> <li>• Exclude participants who are likely to be difficult to follow for the duration of the trial (e.g. no fixed address, patients with dementia and no family support)</li> <li>• Be explicit about follow up procedures including when to expect contact from study staff, how often, and what type of contact (in person, email, phone etc.)</li> </ul> | <ul style="list-style-type: none"> <li>• Collect several personal contacts including friends or family members to assist with locating patients later</li> <li>• Ensure informed consent is conducted in an appropriate manner, including using examples and explanations that are accessible to a lay audience</li> </ul> | <ul style="list-style-type: none"> <li>• Provide participants with a choice of email, phone, and/or in-clinic visits when appropriate (i.e. when no radiographs are required)</li> <li>• Be flexible on scheduling in-clinic visits</li> <li>• ensure participants can easily contact study personnel by providing them with contact information that is easy to access</li> <li>• Routinely verify that the participant's contact information is up to date</li> </ul> | <ul style="list-style-type: none"> <li>• Try previously disconnected phone numbers</li> <li>• Search online or in telephone books for updated contact information</li> <li>• Search the hospital's database for hospital admissions</li> <li>• Try to contact participants from a different phone number or at a different time of day</li> <li>• Hold regular staff meetings to brainstorm creative ways to locate participants who are difficult to contact</li> </ul> |
